# Supplementary material for: Both Rare and De Novo Copy Number Variants Are Prevalent in Agenesis of the Corpus Callosum but Not in Cerebellar Hypoplasia or Polymicrogyria
Source: PLoS Genet. 2013 Oct 3;9(10):e1003823. doi: 10.1371/journal.pgen.1003823 (PMC3789824; doi:10.1371/journal.pgen.1003823)
Supplement: Table S5 — Independent qPCR-based confirmation of patient-specific CNVs and their inheritance. (XLS) [file pgen.1003823.s013.xls]

## Sheet: CNVs tested by qPCR
Table S5. List of patient-specific CNVs selected for qPCR-based confirmation and inheritance evaluation.
Patient ID	Diagnosis	Interval (Hg18)	Cytoband	No. exonic genes	Length (bp)	Copy state on array	Did qPCR confirm presence of CNV in patient?	Inheritance (qPCR)	No. of previously known overlapping genomic intervals for ACC,CBLH,PMG (See Table S9)	De novo CNVs in Autism Spectrum (Table S6) that overlap with CNVs in brain malformations	Single genes implicated in ASD	Genes from Mouse Genome Informatics (MGI) with mouse nervous system phenotype (MP:0003631)	Overall pathogenicity score
1351-0	ACC	chr17:15521-11307413	17p13.3-p12	307	11291893	Dup	Yes	De novo	1(ACC)	chr17:6032329-7294541_DUP///chr17:6058839-7292887_DUP	PER1	ABR,AIPL1,ARRB2,ASPA,ATP1B2,CAMKK1,CHRNB1,CHRNE,CRK,DLG4,DPH1,DVL2,EFNB3,FXR2,GUCY2D,HIC1,MED31,MYH10,MYO1C,NDEL1,NLGN2,NTN1,PAFAH1B1,PER1,PFN1,PIRT,PITPNA,SERPINF1,SLC2A4,SRR,TP53,TRPV1,VAMP2,YWHAE	24
1020-0	ACC-CBLH	chr8:12595527-43926760	8p23.1-p11.1	256	31331234	Dup	Yes	De novo	3(ACC,CBLH)	-	-	ANK1,AP3M2,CHRNA2,CHRNA6,CLU,DLC1,EBF2,EGR3,FGF17,FGFR1,FZD3,GFRA2,GNRH1,HR,IKBKB,MSR1,MYST3,NAT1,NEFL,NEFM,NRG1,PLAT,POLB,SFRP1,VDAC3	22
1228-0	ACC	chr8:12595527-43926760	8p23.1-p11.1	256	31331234	Dup	Yes	De novo	3(ACC,CBLH)	-	-	ANK1,AP3M2,CHRNA2,CHRNA6,CLU,DLC1,EBF2,EGR3,FGF17,FGFR1,FZD3,GFRA2,GNRH1,HR,IKBKB,MSR1,MYST3,NAT1,NEFL,NEFM,NRG1,PLAT,POLB,SFRP1,VDAC3	22
1020-0	ACC-CBLH	chr8:197819-6913279	8p23.3-p23.1	36	6715461	Del	Yes	De novo	2(ACC,CBLH)	chr8:3965290-4351494_DEL///chr8:704383-1521910_DUP///chr8:710491-1501580_DUP	DLGAP2,MCPH1	CLN8	22
1041-0	ACC-CBLH	chr8:179030-6913279	8p23.3-p23.1	37	6734250	Del	Yes	De novo	3(ACC,CBLH)	chr8:3965290-4351494_DEL///chr8:704383-1521910_DUP///chr8:710491-1501580_DUP	DLGAP2,MCPH1	CLN8	22
1228-0	ACC	chr8:179030-6913279	8p23.3-p23.1	37	6734250	Del	Yes	De novo	3(ACC,CBLH)	chr8:3965290-4351494_DEL///chr8:704383-1521910_DUP///chr8:710491-1501580_DUP	DLGAP2,MCPH1	CLN8	22
LR02-049	ACC	chr2:96787353-113658240	2q11.2-q13	171	16870888	Dup	Yes	De novo	0 (novel ACC interval)	chr2:103264154-108718935_DEL///chr2:110050606-111021091_DEL	NPAS2	BCL2L11,CHST10,CNGA3,IL1B,INPP4A,MERTK,NCK2,NPAS2,POU3F3,RANBP2,SLC5A7,TTL	22
1187-0	ACC	chr1:235378791-247169190	1q43-q44	111	11790400	Del	Yes	De novo	1(ACC)	chr1:244684537-246137743_DEL///chr1:238596122-238912325_DUP///chr1:238597914-238908329_DUP///chr1:240710016-240976706_DUP///chr1:240718979-240968200_DUP	OR1C1,RGS7	AKT3,CHRM3,RYR2,ZNF238	22
1412-0	ACC-CBLH-PMG	chr4:74621654-96253001	4q13.3-q22.3	169	21631348	Del	Yes	De novo	1(PMG)	chr4:83321860-83559629_DEL///chr4:93504950-94636268_DUP	-	AFF1,ATOH1,BMPR1B,CXCL10,GRID2,MAPK10,NKX6-1,PTPN13,SCARB2,SHROOM3,SNCA,SPARCL1,SPP1	22
1006-0	ACC	chr8:12595527-43811979	8p23.1-p11.1	256	31216453	Dup	Yes	De novo	1(ACC)	-	-	ANK1,AP3M2,CHRNA2,CHRNA6,CLU,DLC1,EBF2,EGR3,FGF17,FGFR1,FZD3,GFRA2,GNRH1,HR,IKBKB,MSR1,MYST3,NAT1,NEFL,NEFM,NRG1,PLAT,POLB,SFRP1,VDAC3	21
1041-0	ACC-CBLH	chr8:12595527-36223678	8p23.1-p12	179	23628152	Dup	Yes	De novo	2(ACC,CBLH)	-	-	CHRNA2,CLU,DLC1,EBF2,EGR3,FGF17,FZD3,GFRA2,GNRH1,HR,MSR1,NAT1,NEFL,NEFM,NRG1	21
1006-0	ACC	chr8:183585-7808664	8p23.3-p23.1	50	7625080	Del	Yes	De novo	1(ACC)	chr8:3965290-4351494_DEL///chr8:704383-1521910_DUP///chr8:710491-1501580_DUP	DLGAP2,MCPH1	CLN8	21
1356-0	ACC	chr8:154984-6913279	8p23.3-p23.1	38	6758296	Del	Yes	De novo	1(ACC)	chr8:3965290-4351494_DEL///chr8:704383-1521910_DUP///chr8:710491-1501580_DUP	DLGAP2,MCPH1	CLN8	21
1130-0	ACC	chr15:21172300-26208861	15q11.2-q13.1	104	5036562	Del	Yes	De novo	0 (novel ACC interval)	chr15:21190624-26203954_DUP///chr15:21240037-26095621_DUP///chr15:21343866-21505342_DUP///chr15:21224486-26313261_DUP///chr15:19767013-26134114_DUP	ATP10A,GABRA5,GABRB3,UBE3A	GABRA5,GABRB3,NDN,UBE3A	21
1364-0	ACC	chr6:161939434-170656616	6q26-q27	60	8717183	Del	Yes	De novo	1(ACC)	-	PARK2,RPS6KA2	CCR6,DLL1,MLLT4,PARK2,QKI,T	21
1356-0	ACC	chr8:12512547-42012236	8p23.1-p11.21	237	29499690	Dup	Yes	De novo	1(ACC)	-	-	ANK1,CHRNA2,CLU,DLC1,EBF2,EGR3,FGF17,FGFR1,FZD3,GFRA2,GNRH1,HR,MSR1,MYST3,NAT1,NEFL,NEFM,NRG1,SFRP1	20
1610-0	ACC	chr8:12538636-33311183	8p23.1-p12	174	20772548	Dup	Yes	De novo	1(ACC)	-	-	CHRNA2,CLU,DLC1,EBF2,EGR3,FGF17,FZD3,GFRA2,GNRH1,HR,MSR1,NAT1,NEFL,NEFM,NRG1	20
1192-0	ACC	chr8:22609566-43689385	8p21.3-p11.1	185	21079820	Dup	Yes	De novo	1(ACC)	-	-	ANK1,AP3M2,CHRNA2,CHRNA6,CLU,EBF2,FGFR1,FZD3,GNRH1,IKBKB,MYST3,NEFL,NEFM,NRG1,PLAT,POLB,SFRP1,VDAC3	20
1586-0	ACC-CBLH	chr1:240394199-243529398	1q43-q44	25	3135200	Del	Yes	De novo	1(ACC)	chr1:240710016-240976706_DUP///chr1:240718979-240968200_DUP	-	AKT3,ZNF238	20
1020-0	ACC-CBLH	chr1:241945126-247185943	1q44	89	5240818	Dup	Yes	De novo	1(ACC)	chr1:244684537-246137743_DEL	OR1C1	AKT3,ZNF238	20
1574-0	ACC-CBLH	chr1:220541565-228085645	1q41-q42.13	105	7544081	Del	Yes	De novo	1(ACC)	-	-	DISP1,ENAH,GJC2,LBR,LEFTY1,LEFTY2,LIN9,MIXL1,NUP133,PARP1,PSEN2,TP53BP2,WNT3A	20
LR01-282	ACC-PMG	chr1:61236413-75237180	1p31.3-p31.1	82	14000768	Del	Yes	De novo	0 (novel ACC/PMG interval)	-	NEGR1	DNAJC6,FOXD3,GADD45A,LEPR,NFIA,RPE65	19
1610-0	ACC	chr8:82919646-88810045	8q21.13-q21.3	22	5890400	Del	Yes	De novo	0	chr8:85020322-88388623_DEL	-	CNGB3,E2F5	18
1616-0	ACC-CBLH-PMG	chr20:61246930-62426157	20q13.33	54	1179228	Del	Yes	Pat	1(ACC)	chr20:61323074-61370750_DEL///chr20:61588512-61668792_DUP///chr20:60949339-62377000_DUP	-	CHRNA4,DNAJC5,EEF1A2,KCNQ2,OPRL1,RTEL1	16
1070-0	ACC	chr2:143970610-146955159	2q22.2-q22.3	8	2984550	Del	Yes	De novo	1(ACC)	-	-	ZEB2	15
1221-0	ACC-PMG	chr11:21871965-26730606	11p14.3-p14.2	13	4858642	Dup	Yes	De novo	0 (novel ACC/PMG interval)	-	-	SLC17A6	15
1574-0	ACC-CBLH	chr1:190709879-193085819	1q31.2-q31.3	9	2375941	Del	Yes	De novo	0 (novel ACC/CBLH interval)	-	-	CDC73,RGS2	15
LR08-130	CBLH	chr5:116416478-120055246	5q23.1	10	3638769	Del	Yes	De novo	0 (novel CBLH interval)	-	-	HSD17B4	14
LR03-181	ACC	chr9:139238269-140156466	9q34.3	32	918198	Del	Yes	ND	1(ACC)	chr9:139799894-140192015_DEL	-	CACNA1B,EHMT1	13
1338-0	ACC	chr17:41063083-41562443	17q21.31	9	499361	Del	Yes	De novo	1(ACC)	-	-	CRHR1,MAPT	13
1327-0	ACC	chr20:391798-746755	20p13	6	354958	Dup	Yes	De novo	1(ACC)	-	-	CSNK2A1	13
1428-0	ACC-CBLH-PMG	chr1:242140253-243529398	1q44	16	1389146	Del	Yes	Mat	2(ACC,PMG)	-	-	ZNF238	12
LR02-148	CBLH	chrX:153072241-153534039	Xq28	29	461799	Dup	Yes	Mat	0	-	RPL10	FLNA,G6PD,GDI1,PLXNA3	11
1310-0	ACC	chr17:31889664-33348760	17q12	20	1459097	Del	Yes	Pat	0	chr17:31889664-33570026_DEL	-	LHX1	11
LP97-141a1	ACC-PMG	chr16:15369798-16195546	16p13.11	13	825749	Del	Yes	Pat	0 (novel ACC/PMG interval)	chr16:15352729-16370751_DUP	-	NDE1	10
1127-0	ACC	chr9:13034407-14653394	9p23-p22.3	6	1618988	Del	Yes	ND	1(ACC)	-	-	NFIB	10
1258-0	ACC	chr14:38923501-39078057	14q21.1	1	154557	Dup	Yes	De novo	1(ACC)	-	FBXO33	-	10
1300-0	ACC	chr7:158396815-158558805	7q36.3	4	161991	Dup	Yes	De novo	1(ACC)	-	-	-	10
1546-0	ACC	chr7:142965893-143193381	7q35	9	227489	Del	Yes	De novo	0 (novel ACC interval)	-	-	-	10
LR00-086	ACC-CBLH-PMG	chr3:58876696-60171577	3p14.2	4	1294882	Dup	Yes	Mat	0	chr3:60746033-60847540_DEL///chr3:61072100-61365196_DUP	FHIT	-	10
1028-0	ACC	chr16:18714812-18956879	16p12.3	4	242068	Dup	Yes	De novo	0 (novel ACC interval)	-	-	-	9
1297-0	CBLH-PMG	chr4:56794366-57730974	4q12	14	936609	Dup	Yes	Pat	0	-	-	REST	9
1303-0	ACC-PMG	chr15:85185010-86616486	15q25.3	4	1431477	Del	Yes	ND	0	-	NTRK3	NTRK3	9
1412-0	ACC-CBLH-PMG	chr1:45995673-46235468	1p34.1	3	239796	Dup	Yes	De novo	0 (novel ACC/CBLH/PMG interval)	-	-	-	9
1551-0	ACC	chr2:198382429-199160281	2q33.1	2	777853	Dup	Yes	ND	1(ACC)	-	-	PLCL1	8
LR00-086	ACC-CBLH-PMG	chr6:162882252-163106351	6q26	2	224100	Del	Yes	Mat	3(ACC,PMG,CBLH)	-	PARK2	PARK2	8
1124-0	ACC-CBLH	chr15:82914976-83529838	15q25.2-q25.3	13	614863	Del	Yes	Mat	0	-	-	-	8
1373-0	ACC	chr21:20744417-21601507	21q21.1	6	857091	Dup	Yes	ND	0	-	-	NCAM2	8
LR01-099	CBLH	chr20:36454392-36829534	20q11.23	12	375143	Dup	Yes	Mat	0	-	-	SLC32A1	8
LR08-195	ACC-CBLH	chr21:44879054-45154168	21q22.3	12	275115	Dup	Yes	Mat	2(ACC)	-	-	-	8
1329-0	ACC	chr22:17202486-17388108	22q11.21	8	185623	Dup	Yes	ND	1(ACC)	-	-	PRODH	7
LR05-350a1	ACC	chr22:17202486-17345628	22q11.21	6	143143	Dup	Yes	Pat	1(ACC)	-	-	PRODH	7
1328-0	ACC	chr15:29816096-30302218	15q13.3	7	486123	Dup	Yes	Pat	0	-	-	CHRNA7	7
LR04-340	CBLH	chr6:161521152-161736650	6q26	4	215499	Dup	Yes	Mat	1(CBLH)	-	PARK2	PARK2	7
1020-0	ACC-CBLH	chr14:69961223-70005628	14q24.2	1	44406	Dup	Yes	De novo	0 (novel ACC/CBLH interval)	-	-	-	7
1052-0	ACC	chr22:15300434-15842185	22q11.1	8	541752	Dup	Yes	Pat	0	-	-	-	7
1118-0	ACC	chr3:180432991-180730310	3q26.32-q26.33	6	297320	Dup	Yes	ND	0	-	-	MFN1,PIK3CA	7
1124-0	ACC-CBLH	chr3:37341463-37537145	3p22.2	4	195683	Del	Yes	Mat	1(CBLH)	chr3:37253000-37428450_DEL///chr3:37257074-37432212_DEL	-	-	7
1223-0	ACC-CBLH	chrX:152829448-153034217	Xq28	8	204770	Dup	Yes	ND	0	-	MECP2	MECP2	7
1506-0	ACC-CBLH	chr3:12630689-12781123	3p25.1	2	150435	Dup	Yes	Pat	2(ACC,CBLH)	-	-	RAF1	7
1639-0	CBLH	chr1:173189969-173648549	1q25.1	8	458581	Dup	Yes	Mat	0	-	-	TNR	7
DP99-022a1	ACC-CBLH	chr9:39049230-39960742	9p13.1	5	911513	Dup	Yes	ND	1(CBLH)	-	-	-	7
LR04-017	CBLH	chr10:113773578-114207244	10q25.2	6	433667	Dup	Yes	Mat	0	-	-	TECTB	7
LR08-360	CBLH	chr11:131448027-132052327	11q25	3	604301	Dup	Yes	Mat	1(CBLH)	-	-	-	7
LR09-108	ACC-CBLH	chr6:166512059-166750686	6q27	5	238628	Dup	Yes	ND	2(ACC,CBLH)	-	RPS6KA2	-	7
1335-4	ACC	chr15:29816096-30231488	15q13.3	5	415393	Dup	Yes	ND	0	-	-	CHRNA7	6
1559-0	ACC-CBLH	chr15:29816096-30231488	15q13.3	5	415393	Dup	Yes	Pat	0	-	-	CHRNA7	6
LR02-172	PMG	chr15:29816096-30231488	15q13.3	5	415393	Dup	Yes	ND	0	-	-	CHRNA7	6
LR05-007	CBLH	chr15:29816096-30231488	15q13.3	5	415393	Dup	Yes	Mat	0	-	-	CHRNA7	6
1147-0	ACC-CBLH-PMG	chr11:13501228-13978590	11p15.2	2	477363	Dup	Yes	ND	1(ACC)	-	-	-	6
1170-0	ACC-CBLH-PMG	chr4:74995082-75325349	4q13.3	8	330268	Dup	Yes	Mat	0	-	-	-	6
1351-0	ACC	chr11:4543829-4646318	11p15.4	7	102490	Del	Yes	Pat	1(ACC)	-	-	-	6
1428-0	ACC-CBLH-PMG	chr1:244800493-244925805	1q44	2	125313	Dup	Yes	Mat	2(ACC,PMG)	-	-	-	6
1559-0	ACC-CBLH	chr20:3777667-3839896	20p13	6	62230	Dup	Yes	Pat	1(ACC)	-	-	PANK2	6
1571-0	ACC-PMG	chr5:179980018-180168181	5q35.3	6	188164	Dup	Yes	Mat	0	-	-	MGAT1	6
LR01-191	ACC-CBLH-PMG	chr9:27237314-27343460	9p21.2	3	106147	Del	Yes	Pat	2(ACC,CBLH)	-	-	-	6
LR01-226a2	ACC-CBLH	chr3:178005644-178320443	3q26.32	2	314800	Dup	Yes	Pat	1(CBLH)	-	-	-	6
LR02-147	PMG	chr9:18868842-19081387	9p22.1	6	212546	Dup	Yes	ND	0	chr9:18645961-18650695_DEL	-	-	6
LR04-418	ACC	chr8:103253970-103425288	8q22.3	5	171319	Dup	Yes	Mat	0	-	-	RRM2B,UBR5	6
LR05-354	ACC-CBLH	chrX:55824012-56311970	Xp11.21	2	487959	Dup	Yes	Mat	0	-	-	-	5
1029-0	ACC-CBLH	chr17:6699238-6801331	17p13.2-p13.1	1	102094	Del	Yes	ND	2(ACC)	-	-	-	5
1049-0	ACC-CBLH-PMG	chr16:88596560-88677423	16q24.3	9	80864	Dup	Yes	Pat	1(ACC)	-	-	-	5
1235-0	ACC-CBLH	chr1:65651840-65722644	1p31.3	3	70805	Dup	Yes	Mat	0	-	-	DNAJC6,LEPR	5
1308-0	ACC	chr1:39317856-39691821	1p34.3-p34.2	3	373966	Dup	Yes	ND	0	-	-	-	5
1376-0	ACC	chr16:88629885-88677423	16q24.3	6	47539	Dup	Yes	Mat	1(ACC)	-	-	-	5
1392-0	ACC	chr19:23253264-23611206	19p12	4	357943	Dup	Yes	Mat	0	-	-	-	5
1406-0	ACC-CBLH-PMG	chr14:101963509-102183305	14q32.31	3	219797	Dup	Yes	ND	1(ACC)	-	-	-	5
1428-3A	ACC	chr1:244800493-244909938	1q44	2	109446	Dup	Yes	ND	1(ACC)	-	-	-	5
1476-0	ACC	chr7:44277470-44393674	7p13	5	116205	Dup	Yes	Pat	0	-	-	CAMK2B	5
1484-0	ACC	chr18:49347873-49536377	18q21.2	1	188505	Del	Yes	Pat	2(ACC)	-	-	-	5
1487-0	ACC	chr6:5037237-5318831	6p25.1	3	281595	Dup	Yes	ND	1(ACC)	-	-	-	5
1639-0	CBLH	chr1:168166051-168455272	1q24.2	2	289222	Dup	Yes	Mat	0	-	-	KIFAP3	5
1645-0	ACC-CBLH	chr14:66969020-67212810	14q23.3-q24.1	7	243791	Dup	Yes	Pat	0	-	-	-	5
LR01-194	ACC-CBLH	chr16:88171502-88279695	16q24.3	5	108194	Dup	Yes	Pat	1(ACC)	-	-	-	5
LR01-226a2	ACC-CBLH	chr10:76483368-76751854	10q22.2	7	268487	Dup	Yes	Mat	0	-	-	-	5
LR02-400	CBLH	chr1:245567273-245850513	1q44	8	283241	Del	Yes	Pat	0	-	-	-	5
LR03-274	CBLH	chrX:74434884-74564139	Xq13.3	3	129256	Dup	Yes	Mat	0	-	-	ZDHHC15	5
LR04-290	ACC-CBLH	chr17:6699238-6801331	17p13.2-p13.1	1	102094	Del	Yes	Pat	2(ACC)	-	-	-	5
LR05-365	ACC-CBLH-PMG	chr14:101970521-102198530	14q32.31	3	228010	Dup	Yes	Mat	1(ACC)	-	-	-	5
LR05-398	CBLH	chr8:140978666-141334869	8q24.3	2	356204	Del	Yes	Pat	0	-	-	-	5
LR06-139	ACC-CBLH	chr13:39634262-39966593	13q14.11	2	332332	Del	Yes	Mat	0	-	-	-	5
1022-0	ACC-CBLH	chr12:55063372-55164387	12q13.2	4	101016	Del	Yes	Pat	0	-	-	-	4
1223-0	ACC-CBLH	chrX:153183611-153263157	Xq28	3	79547	Dup	Yes	ND	0	-	-	FLNA	4
LR06-132	PMG	chr1:145672394-145842605	1q21.1	2	170212	Dup	Yes	ND	0	-	-	-	4
1024-0	ACC-CBLH	chr5:169515751-169707277	5q35.1	4	191527	Del	Yes	Mat	0	-	-	-	4
1089-0	ACC	chr10:29688183-29799440	10p11.23	3	111258	Dup	Yes	ND	0	-	-	-	4
1158-0	ACC	chr3:37341463-37506860	3p22.2	4	165398	Dup	Yes	ND	0	-	-	-	4
1189-0	ACC	chr18:29371980-29542462	18q12.1	1	170483	Dup	Yes	Pat	1(ACC)	-	-	-	4
1199-0	ACC	chr1:14673740-14842456	1p36.21	1	168717	Dup	Yes	Pat	1(ACC)	-	-	-	4
1200-0	ACC	chr4:26194409-26376294	4p15.2	1	181886	Dup	Yes	Pat	1(ACC)	-	-	-	4
1303-0	ACC-PMG	chr19:51446375-51543766	19q13.32	3	97392	Dup	Yes	ND	1(ACC)	-	-	-	4
1304-0	ACC	chr2:33099995-33206725	2p22.3	1	106731	Del	Yes	Pat	0	-	-	LTBP1	4
1339-0	ACC-PMG	chr2:132886835-133048174	2q21.2	1	161340	Dup	Yes	Pat	1(ACC)	-	-	-	4
1400-0	ACC	chr7:149191005-149261171	7q36.1	5	70167	Dup	Yes	Pat	1(ACC)	-	-	-	4
1412-0	ACC-CBLH-PMG	chr6:29076909-29233726	6p22.1	4	156818	Del	Yes	Pat	0	-	-	-	4
1428-0	ACC-CBLH-PMG	chr1:245006566-245059321	1q44	1	52756	Dup	Yes	Mat	2(ACC,PMG)	-	-	-	4
1477-0	ACC	chr13:110178685-110314631	13q34	1	135947	Del	Yes	ND	1(ACC)	-	-	-	4
1503-0	ACC	chr5:108394372-108629936	5q21.3	2	235565	Del	Yes	Mat	0	-	-	-	4
1512-0	ACC	chr1:92138762-92359771	1p22.1	4	221010	Dup	Yes	Mat	0	-	-	-	4
1536-0	ACC	chr10:38425447-38659180	10p11.21	2	233734	Dup	Yes	Pat	0	-	-	-	4
1599-0	ACC-CBLH	chr5:29059061-29351024	5p14.1-p13.3	1	291964	Dup	Yes	ND	1(ACC)	-	-	-	4
1674-0	ACC	chr7:80255746-80409400	7q21.11	1	153655	Del	Yes	Pat	0	-	-	SEMA3C	4
1674-0	ACC	chr7:94947723-95163670	7q21.3	2	215948	Del	Yes	Pat	0	-	-	-	4
LP97-141a1	ACC-PMG	chr1:245438541-245473054	1q44	1	34514	Del	Yes	ND	2(ACC,PMG)	-	-	-	4
LP99-207	CBLH	chr10:32896752-33001940	10p11.22	2	105189	Del	Yes	ND	0	-	-	-	4
LR00-003a1	PMG	chr11:19015027-19181699	11p15.1	3	166673	Dup	Yes	Mat	0	-	-	-	4
LR00-086	ACC-CBLH-PMG	chr16:87768284-87825453	16q24.3	3	57170	Del	Yes	Mat	1(ACC)	-	-	-	4
LR00-086	ACC-CBLH-PMG	chr3:58473883-58598384	3p14.3-p14.2	3	124502	Dup	Yes	Mat	0	-	-	-	4
LR02-109	ACC	chr3:178350747-178473476	3q26.32	2	122730	Dup	Yes	Mat	0	-	-	-	4
LR02-186	CBLH	chr4:90030218-90153229	4q22.1	3	123012	Del	Yes	Mat	0	-	-	-	4
LR03-254	CBLH	chr21:46301129-46466700	21q22.3	5	165572	Del	Yes	Pat	0	-	-	-	4
LR03-260	PMG	chr15:50179198-50272316	15q21.2	4	93119	Del	Yes	ND	0	-	-	GNB5	4
LR03-419	CBLH	chr3:28435369-28575463	3p24.1	1	140095	Del	Yes	Pat	1(CBLH)	-	-	-	4
LR04-097	PMG	chr8:270645-454592	8p23.3	5	183948	Dup	Yes	ND	0	-	-	-	4
LR04-104	CBLH	chr9:96250713-96378817	9q22.32	5	128105	Dup	Yes	Mat	0	-	-	-	4
LR04-141	PMG	chr1:22193698-22262659	1p36.12	4	68962	Dup	Yes	Mat	0	-	-	CDC42	4
LR05-007	CBLH	chr1:195077621-195199868	1q31.3	3	122248	Dup	Yes	Mat	0	-	-	-	4
LR05-264a1	CBLH-PMG	chr19:6852891-7056136	19p13.3-p13.2	5	203246	Dup	Yes	Mat	0	-	-	-	4
LR05-313	CBLH-PMG	chr13:56451347-56803216	13q21.1	1	351870	Dup	Yes	ND	0	-	-	-	4
LR06-132	PMG	chr3:199053956-199189326	3q29	5	135371	Dup	Yes	ND	0	-	-	-	4
LR06-137	CBLH	chr5:115251403-115453527	5q23.1	5	202125	Dup	Yes	Mat	0	-	-	-	4
LR07-125	ACC	chr2:98082296-98205799	2q11.2	3	123504	Del	Yes	Mat	0	-	-	-	4
LR08-005	PMG	chrX:85819695-86213007	Xq21.2-q21.31	1	393313	Dup	Yes	Mat	0	-	-	-	4
LR08-051	PMG	chr16:48285075-48387705	16q12.1	1	102631	Del	Yes	Mat	0	-	-	ZNF423	4
LR08-095	PMG	chr3:69483938-69649601	3p14.1	2	165664	Del	Yes	Pat	0	-	-	-	4
LR09-108	ACC-CBLH	chr5:99709861-99963989	5q21.1	3	254129	Dup	Yes	ND	0	-	-	-	4
LR09-177a2	CBLH	chr9:114443406-114629072	9q32	3	185667	Dup	Yes	ND	0	-	-	-	4
1476-0	ACC	chr4:100421101-100451623	4q23	3	30523	Dup	Yes	Mat	0	-	-	-	3
1062-0	ACC-PMG	chr2:36812990-36881323	2p22.2	1	68334	Del	Yes	ND	1(PMG)	-	-	-	3
1077-0	ACC	chrX:125083419-125186627	Xq25	1	103209	Del	Yes	ND	0	-	-	-	3
1147-0	ACC-CBLH-PMG	chr11:14029239-14062073	11p15.2	1	32835	Dup	Yes	ND	1(ACC)	-	-	-	3
1189-0	ACC	chr1:159911579-159947492	1q23.3	3	35914	Dup	Yes	Mat	0	-	-	-	3
1270-0	ACC-CBLH	chr1:102175333-102246147	1p21.1	2	70815	Dup	Yes	Pat	0	-	-	-	3
1270-0	ACC-CBLH	chr3:112606693-112751926	3q13.13	1	145234	Del	Yes	Mat	0	-	-	-	3
1324-0	ACC	chr4:56672797-56797804	4q12	1	125008	Dup	Yes	Mat	0	-	-	-	3
1407-0	ACC	chr2:870072-908533	2p25.3	2	38462	Dup	Yes	Pat	0	-	-	-	3
1427-0	ACC	chr1:17358138-17429720	1p36.13	1	71583	Dup	Yes	ND	1(ACC)	-	-	-	3
1428-3A	ACC	chr21:26144693-26238745	21q21.3	1	94053	Dup	Yes	ND	0	-	-	APP	3
1512-0	ACC	chr1:91994863-92074957	1p22.2-p22.1	2	80095	Dup	Yes	Pat	0	-	-	-	3
1645-0	ACC-CBLH	chr4:98528607-98794342	4q22.3	1	265736	Del	Yes	Mat	0	-	-	-	3
LP90-062	CBLH	chr15:100144160-100194284	15q26.3	2	50125	Del	Yes	Pat	0	-	-	-	3
LP95-051a1	PMG	chr6:94426358-94593865	6q16.1	1	167508	Del	Yes	Pat	0	-	-	-	3
LR00-016a3	PMG	chr16:54390068-54420550	16q12.2	2	30483	Dup	Yes	Pat	0	-	-	-	3
LR01-323	PMG	chr7:100410569-100456577	7q22.1	3	46009	Dup	Yes	ND	0	-	-	-	3
LR02-109	ACC	chr19:51420697-51476455	19q13.32	1	55759	Dup	Yes	Pat	1(ACC)	-	-	-	3
LR02-180	PMG	chr9:115855598-115906875	9q32	3	51278	Dup	Yes	ND	0	-	-	-	3
LR02-245	PMG	chr4:15294903-15377296	4p15.33-p15.32	3	82394	Dup	Yes	Pat	0	-	-	-	3
LR03-055	CBLH	chr15:77961443-78024287	15q25.1	3	62845	Dup	Yes	Mat	0	-	-	-	3
LR03-181	ACC	chr4:99320074-99448862	4q23	1	128789	Del	Yes	ND	0	-	-	-	3
LR03-218	CBLH	chr2:218357732-218412483	2q35	2	54752	Dup	Yes	Pat	0	-	-	-	3
LR03-318	PMG	chr11:50002713-50301966	11p11.12	1	299254	Del	Yes	ND	0	-	-	-	3
LR04-008	PMG	chr11:85103978-85143043	11q14.1	2	39066	Del	Yes	Pat	0	-	-	-	3
LR04-078	PMG	chr12:129398875-129450300	12q24.33	2	51426	Dup	Yes	ND	0	-	-	-	3
LR04-221	CBLH	chr10:15030375-15100889	10p13	2	70515	Del	Yes	ND	0	-	-	-	3
LR04-340	CBLH	chr17:2953235-3011784	17p13.3	1	58550	Del	Yes	Pat	1(CBLH)	-	-	-	3
LR06-132	PMG	chr1:144933825-145032948	1q21.1	2	99124	Dup	Yes	ND	0	-	-	-	3
LR06-132	PMG	chr1:145430649-145526035	1q21.1	2	95387	Dup	Yes	ND	0	-	-	-	3
LR06-188	PMG	chr16:74086012-74141000	16q23.1	3	54989	Del	Yes	Mat	0	-	-	-	3
LR06-246	CBLH-PMG	chr5:118919581-119105372	5q23.1	1	185792	Del	Yes	Mat	0	-	-	-	3
LR07-150	PMG	chr6:151469078-151587754	6q25.1	1	118677	Dup	Yes	Pat	0	-	-	-	3
1169-0	ACC-CBLH	chr2:33528008-33595788	2p22.3	1	67781	Dup	Yes	Pat	0	-	-	-	2
1296-0	ACC	chr16:73476286-73525320	16q23.1	1	49035	Del	Yes	Pat	0	-	-	-	2
1385-0	ACC	chr4:88405533-88447252	4q22.1	1	41720	Del	Yes	ND	0	-	-	-	2
1533-0	PMG	chr6:124313139-124391083	6q22.31	1	77945	Del	Yes	ND	0	-	-	-	2
1572-0	ACC	chr3:99766973-99850215	3q11.2-q12.1	1	83243	Dup	Yes	ND	0	-	-	-	2
LR01-164	PMG	chr10:26906426-26941427	10p12.1	1	35002	Del	Yes	Pat	0	-	-	-	2
LR01-194	ACC-CBLH	chr1:151476212-151532151	1q21.3	1	55940	Dup	Yes	Mat	0	-	-	-	2
LR01-327a1	CBLH	chr4:66233214-66279452	4q13.1	1	46239	Del	Yes	Mat	0	-	-	-	2
LR02-263	CBLH	chr6:119808112-119860742	6q22.31	1	52631	Del	Yes	ND	0	-	-	-	2
LR02-429	PMG	chr17:15274287-15314642	17p12	1	40356	Dup	Yes	ND	0	-	-	-	2
LR04-069	PMG	chr19:51411486-51476455	19q13.32	1	64970	Dup	Yes	ND	0	-	-	-	2
LR04-306	CBLH	chrX:85921355-85984247	Xq21.2	1	62893	Dup	Yes	Mat	0	-	-	-	2
LR05-208	PMG	chr4:3320046-3368188	4p16.2	1	48143	Dup	Yes	Mat	0	-	-	-	2
LR05-369	CBLH	chr2:183686187-183746138	2q32.1	1	59952	Dup	Yes	Pat	0	-	-	-	2
LR05-398	CBLH	chr4:97404282-97497372	4q22.3	1	93091	Del	Yes	Pat	0	-	-	-	2
LR06-097	PMG	chr6:68620049-68701040	6q12	1	80992	Dup	Yes	ND	0	-	-	-	2
LR06-246	CBLH-PMG	chr11:108208507-108288488	11q22.3	1	79982	Dup	Yes	Pat	0	-	-	-	2
LR08-005	PMG	chr1:108843307-108910289	1p13.3	1	66983	Del	Yes	Mat	0	-	-	-	2
LR09-142	PMG	chr17:68524068-68558888	17q25.1	1	34821	Del	Yes	ND	0	-	-	-	2
1007-0	ACC	chr1:46008685-46198087	1p34.1	3	189403	Dup	No	Bi-parental	-	-	-	-	-
1051-0	ACC	chr4:7882363-7974873	4p16.1	1	92511	Del	No	Bi-parental	-	-	-	-	-
1077-0	ACC	chr18:55028469-55063073	18q21.32	1	34605	Dup	No	Bi-parental	-	-	-	-	-
1118-0	ACC	chr4:98658741-98771016	4q22.3	1	112276	Dup	No	Bi-parental	-	-	-	-	-
1250-0	ACC	chr6:114588462-114663764	6q22.1	2	75303	Dup	No	Bi-parental	-	-	HS3ST5	-	-
1314-0	ACC	chr4:190631-252062	4p16.3	2	61432	Dup	No	Bi-parental	-	-	-	-	-
1314-0	ACC	chr7:149130345-149217903	7q36.1	7	87559	Dup	No	Bi-parental	-	-	-	-	-
1421-0	ACC	chr6:163517093-163659391	6q26	3	142299	Dup	No	Bi-parental	-	-	-	-	-
1457-0	ACC	chr1:19415518-19500463	1p36.13	5	84946	Dup	No	Bi-parental	-	-	-	-	-
1483-0	ACC-CBLH	chr1:102166707-102246147	1p21.1	2	79441	Dup	No	Bi-parental	-	-	-	-	-
1483-0	ACC-CBLH	chr3:112606693-112751926	3q13.13	1	145234	Del	No	Bi-parental	-	-	-	-	-
1586-0	ACC-CBLH	chr1:2349841-2480088	1p36.32	7	130248	Dup	No	Bi-parental	-	-	-	HES5	-
1586-0	ACC-CBLH	chr19:555154-602852	19p13.3	4	47699	Dup	No	Bi-parental	-	-	-	FGF22,HCN2	-
1599-0	ACC-CBLH	chr1:3318218-3403857	1p36.32	4	85640	Dup	No	Bi-parental	-	-	-	PRDM16	-
1599-0	ACC-CBLH	chr14:103650825-103764970	14q32.33	1	114146	Dup	No	Bi-parental	-	-	-	KIF26A	-
1599-0	ACC-CBLH	chr17:76720600-76798493	17q25.3	3	77894	Dup	No	Bi-parental	-	-	-	-	-
1599-0	ACC-CBLH	chr17:77288155-77638015	17q25.3	25	349861	Dup	No	Bi-parental	-	chr17:76953064-77782267_DUP	-	FASN,MAFG,RAC3	-
1599-0	ACC-CBLH	chr19:17139979-17182669	19p13.11	2	42691	Dup	No	Bi-parental	-	-	-	-	-
1599-0	ACC-CBLH	chrX:114980856-115021256	Xq23	1	40401	Dup	No	Bi-parental	-	-	-	-	-
1599-0	ACC-CBLH	chrX:122875607-123152101	Xq25	1	276495	Dup	No	Bi-parental	-	-	-	-	-
1599-0	ACC-CBLH	chrX:139555897-139679029	Xq27.1	1	123133	Dup	No	Bi-parental	-	-	-	-	-
1605-0	ACC	chr1:1148140-1278446	1p36.33	15	130307	Dup	No	Bi-parental	-	-	B3GALT6	DVL1,TAS1R3	-
1605-0	ACC	chr19:1426391-1489107	19p13.3	8	62717	Dup	No	Bi-parental	-	-	-	-	-
1605-0	ACC	chr9:135361045-135446967	9q34.2	3	85923	Dup	No	Bi-parental	-	-	-	-	-
1605-0	ACC	chr9:139159061-139421268	9q34.3	22	262208	Dup	No	Bi-parental	-	-	-	GRIN1	-
1641-0	PMG	chr1:1152298-1244704	1p36.33	10	92407	Dup	No	Bi-parental	-	-	B3GALT6	-	-
1641-0	PMG	chr1:2349841-2417572	1p36.32	1	67732	Dup	No	Bi-parental	-	-	-	-	-
1641-0	PMG	chr11:63528576-63582893	11q13.1	1	54318	Dup	No	Bi-parental	-	-	-	-	-
1641-0	PMG	chr16:1192442-1237146	16p13.3	4	44705	Dup	No	Bi-parental	-	-	CACNA1H	CACNA1H	-
1641-0	PMG	chr19:555154-612080	19p13.3	4	56927	Dup	No	Bi-parental	-	-	-	FGF22,HCN2	-
1674-0	ACC	chr11:399815-434628	11p15.5	2	34814	Dup	No	Bi-parental	-	-	-	-	-
1674-0	ACC	chr17:76658879-76787779	17q25.3	6	128901	Dup	No	Bi-parental	-	-	BAIAP2	BAIAP2	-
1674-0	ACC	chr19:532070-608666	19p13.3	6	76597	Dup	No	Bi-parental	-	-	-	FGF22,HCN2	-
1674-0	ACC	chr9:135361045-135444521	9q34.2	3	83477	Dup	No	Bi-parental	-	-	-	-	-
DP96-053_LP	CBLH	chr2:170040640-170077044	2q31.1	2	36405	Del	No	Bi-parental	-	-	-	-	-
LP99-207	CBLH	chr17:76836926-76871369	17q25.3	1	34444	Del	No	Bi-parental	-	-	-	-	-
LP99-207	CBLH	chr21:43663581-43698223	21q22.3	2	34643	Del	No	Bi-parental	-	-	-	-	-
LR01-342	CBLH	chr18:63257384-63333372	18q22.1	1	75989	Del	No	Bi-parental	-	-	-	-	-
LR01-342	CBLH	chr5:140158226-140190800	5q31.3	4	32575	Del	No	Bi-parental	-	-	-	-	-
LR01-342	CBLH	chr6:19920423-19958854	6p22.3	1	38432	Del	No	Bi-parental	-	-	-	ID4	-
LR01-342	CBLH	chr8:25081094-25135419	8p21.2	1	54326	Del	No	Bi-parental	-	-	-	-	-
LR02-148	CBLH	chr14:59952568-59999059	14q23.1	1	46492	Del	No	Bi-parental	-	-	-	-	-
LR02-297a2	ACC-CBLH	chr11:72286767-72397847	11q13.4	1	111081	Del	No	Bi-parental	-	-	-	-	-
LR02-301	CBLH	chr13:59888507-60022262	13q21.2	1	133756	Del	No	Bi-parental	-	-	-	-	-
LR04-005	ACC-CBLH-PMG	chr11:89591158-89682187	11q14.3	1	91030	Dup	No	Bi-parental	-	-	-	-	-
LR04-017	CBLH	chr15:83265502-83301233	15q25.3	1	35732	Del	No	Bi-parental	-	-	-	-	-
LR04-030	CBLH	chr7:20411057-20442719	7p15.3	1	31663	Del	No	Bi-parental	-	-	-	ITGB8	-
LR04-138	ACC-CBLH	chr14:59952568-59993762	14q23.1	1	41195	Del	No	Bi-parental	-	-	-	-	-
LR05-298	CBLH	chr9:132034981-132111739	9q34.11	1	76759	Dup	No	Bi-parental	-	-	-	-	-
LR06-157	ACC-CBLH	chr12:131192621-131249815	12q24.33	3	57195	Dup	No	Bi-parental	-	-	GALNT9	-	-
LR09-128	ACC	chr1:240572588-241002792	1q43	1	430205	Dup	No	Bi-parental	-	chr1:240710016-240976706_DUP///chr1:240718979-240968200_DUP	-	-	-

## Sheet: Pathogenicity score
CNV criterion	Pathogenicity score
Is DeNovo	5
Impacts 1 gene	1
Impacts 2-5 genes	2
Impacts 6-10 genes	3
Impacts 11-20 genes	4
Impacts > 20 genes	5
Length at least 30kb but < 100kb	1
Length at least 100kb but < 300kb	2
Length at least 300kb but < 500kb	3
Length at least 500kb but < 1Mb	4
Length at least 1Mb	5
Overlaps with 1 known brain malformation interval	1
Overlaps with >1 known brain malformation intervals	2
Overlaps with 1 de novo CNV observed in autism spectrum	1
Overlaps with > 1 de novo CNVs observed in autism spectrum	2
Impacts 1 gene implicated in autism spectrum	1
Impacts > 1 genes implicated in autism spectrum	2
Impacts 1 gene resulting in mouse nervous system phenotype in MGI (MP:0003631)	1
Impacts 2-5 genes resulting in mouse nervous system phenotype in MGI (MP:0003631)	2
Impacts 6-10 genes resulting in mouse nervous system phenotype in MGI (MP:0003631)	3
Impacts > 10 genes resulting in mouse nervous system phenotype in MGI (MP:0003631)	4
